# Supplementary material
Source: PubMed Central journal article supplement (PMC3426709)
Supplement: AEM.01257-12_zam999103647so1.pdf [file AEM.01257-12_zam999103647so1.pdf]

**Table S1.** Host range of the bacteriophages UAB\_Phi20, UAB\_Phi78 and UAB\_Phi87.

| Bacteria              | Strain                | Bacteriophage |           |           |
|-----------------------|-----------------------|---------------|-----------|-----------|
|                       |                       | UAB_Phi20     | UAB_Phi78 | UAB_Phi87 |
| <i>S. Enteritidis</i> | 65                    | +             | +         | +         |
|                       | 951                   | +             | +         | +         |
|                       | F20.5CP/94            | +             | +         | +         |
|                       | O/20.9                | +             | +         | +         |
|                       | 6824                  | +             | +         | +         |
|                       | 7129                  | +             | +         | +         |
|                       | 7358                  | +             | +         | +         |
|                       | 7385                  | +             | +         | +         |
|                       | 7593                  | +             | +         | +         |
|                       | 7616                  | +             | +         | +         |
|                       | 8044                  | +             | +         | +         |
|                       | 8419                  | +             | +         | +         |
|                       | 9310                  | +             | +         | +         |
|                       | 9451                  | +             | +         | +         |
|                       | 9449                  | +             | +         | +         |
|                       | 9609                  | +             | +         | +         |
|                       | 2123/F06              | +             | +         | +         |
|                       | 1861/F06              | +             | +         | +         |
|                       | <i>S. Typhimurium</i> | 1             | +         | +         |
| 16                    |                       | -             | -         | -         |
| 124                   |                       | +             | +         | +         |
| 421                   |                       | +             | +         | +         |
| 976                   |                       | -             | +         | -         |
| 887                   |                       | +             | +         | +         |
| 3360                  |                       | +             | +         | +         |
| 4516                  |                       | +             | +         | +         |
| S4426                 |                       | +             | +         | +         |
| S4354                 |                       | +             | -         | +         |
| S5832                 |                       | +             | +         | +         |
| S5833                 |                       | +             | +         | +         |
| 56254                 |                       | +             | +         | +         |
| MG86                  |                       | +             | +         | -         |
| MG98                  |                       | -             | -         | -         |
| J/10.2 CP/96          |                       | +             | +         | +         |
| 5419                  |                       | +             | +         | +         |
| S5827                 |                       | +             | +         | +         |
| S5857                 |                       | +             | +         | +         |
| 5833                  |                       | +             | +         | +         |
| S5801                 |                       | +             | +         | +         |
| S5812                 |                       | +             | +         | +         |
| S5974                 |                       | +             | +         | +         |
| 6231                  |                       | +             | -         | +         |
| 6269                  |                       | +             | +         | +         |
| 7627                  |                       | +             | +         | +         |

**Table S1** (continued)

| Bacteria              | Strain   | Phage     |           |           |
|-----------------------|----------|-----------|-----------|-----------|
|                       |          | UAB_Phi20 | UAB_Phi78 | UAB_Phi87 |
| <i>S. Typhimurium</i> | D/20.5   | +         | +         | +         |
|                       | 7320     | +         | +         | +         |
|                       | 7653     | +         | +         | +         |
|                       | 7987     | +         | +         | +         |
|                       | 8429     | +         | +         | +         |
|                       | J/11.16  | +         | +         | +         |
|                       | 8647     | +         | +         | +         |
|                       | 8880     | +         | +         | +         |
|                       | 9208     | +         | +         | +         |
|                       | 8695     | +         | +         | +         |
|                       | 8862     | +         | +         | +         |
|                       | 9222     | +         | +         | +         |
|                       | 9434     | +         | +         | +         |
|                       | 9849     | +         | +         | +         |
|                       | 9813     | +         | +         | +         |
|                       | 10182    | +         | +         | +         |
|                       | 10082    | +         | +         | -         |
|                       | 10175    | +         | +         | +         |
|                       | 10127    | +         | +         | +         |
|                       | 1992/F06 | +         | +         | +         |
| 1557/F06              | +        | +         | +         |           |
| 1711/F06              | +        | +         | +         |           |
| 1624/F06              | +        | +         | +         |           |

+ Lysis.

- No lysis.

Table S2. Detection of *S. Typhimurium* UA1872 in liver and spleen of chickens by enrichment procedure

| Trial number | Day post-infection | Control grup <sup>1</sup> |        | Treated grup <sup>1</sup> |        |
|--------------|--------------------|---------------------------|--------|---------------------------|--------|
|              |                    | Liver                     | Spleen | Liver                     | Spleen |
| <b>2</b>     | 1                  | 1/3                       | 3/3    | 0/3                       | 0/3    |
|              | 2                  | 3/3                       | 3/3    | 0/3                       | 0/3    |
|              | 6                  | 3/3                       | 3/3    | 2/3                       | 1/3    |
|              | 8                  | 3/3                       | 3/3    | 3/3                       | 1/3    |
|              | 10                 | 3/3                       | 3/3    | 2/3                       | 3/3    |
|              | 13                 | 3/3                       | 3/3    | 2/3                       | 3/3    |
|              | 15                 | 3/3                       | 3/3    | 2/3                       | 1/3    |
|              | 17                 | 2/2                       | 2/2    | 2/2                       | 2/2    |
| <b>3</b>     | 1                  | 1/3                       | 3/3    | 0/3                       | 0/3    |
|              | 2                  | 3/3                       | 3/3    | 0/3                       | 0/3    |
|              | 6                  | 3/3                       | 3/3    | 3/3                       | 2/3    |
|              | 8                  | 3/3                       | 3/3    | 3/3                       | 1/3    |
|              | 10                 | 3/3                       | 3/3    | 3/3                       | 2/3    |
|              | 13                 | 3/3                       | 3/3    | 3/3                       | 2/3    |
|              | 15                 | 3/3                       | 3/3    | 1/3                       | 1/3    |
|              | 17                 | 2/2                       | 2/2    | 2/2                       | 2/2    |

<sup>1</sup> Number of positive samples/Number of samples analyzed
